# Supplementary material for: Exploiting the Prevalence of Homologous Recombination Deficiencies in High-Grade Serous Ovarian Cancer
Source: PubMed Central journal article supplement (PMC7281458; doi:10.3390/cancers12051206), 2020-05-11
Supplement: cancers-12-01206-s001.pdf [file cancers-12-01206-s001.pdf]

# Supplemental materials: Exploiting the Prevalence of Homologous Recombination Deficiencies in High-Grade Serous Ovarian Cancer

Sara Bouberhan, Lauren Philp, Sarah Hill, Linah F Al-Alem and Bo Rueda

**Table S1.** Genes with full coding exonic regions in FoundationOneCDx for the detection of substitutions, insertions and deletions, and copy number alterations.

|            |          |        |         |        |        |        |         |        |          |         |         |          |
|------------|----------|--------|---------|--------|--------|--------|---------|--------|----------|---------|---------|----------|
| (C17orf39) | BAP1     | CCND3  | CSF1R   | ERCC4  | FH     | IDH1   | LTK     | MSH6   | P2RY8    | PPP2R2A | RNF43   | STK11    |
| (MLL)      | BARD1    | CCNE1  | CSF3R   | ERG    | FLCN   | IDH2   | LYN     | MST1R  | PALB2    | PRDM1   | ROS1    | SUFU     |
| (MLL2)     | BCL2     | CD22   | CTCF    | ERRFI1 | FLT1   | IGF1R  | MAF     | MTAP   | PARK2    | PRKAR1A | RPTOR   | SYK      |
| ABL1       | BCL2L1   | CD274  | CTNNA1  | ESR1   | FLT3   | IKBKE  | MAP2K1  | MTOR   | PARP1    | PRKCI   | SDHA    | TBX3     |
| ACVR1B     | BCL2L2   | CD70   | CTNNB1  | EZH2   | FOXL2  | IKZF1  | MAP2K2  | MUTYH  | PARP2    | PTCH1   | SDHB    | TEK      |
| AKT1       | BCL6     | CD79A  | CUL3    | FAM46C | FUBP1  | INPP4B | MAP2K4  | MYC    | PARP3    | PTEN    | SDHC    | TET2     |
| AKT2       | BCOR     | CD79B  | CUL4A   | FANCA  | GABRA6 | IRF2   | MAP3K1  | MYCL   | PAX5     | PTPN11  | SDHD    | TGFBR2   |
| AKT3       | BCORL1   | CDC73  | CXCR4   | FANCC  | GATA3  | IRF4   | MAP3K13 | MYCN   | PBRM1    | PTPRO   | SETD2   | TIPARP   |
| ALK        | BRAF     | CDH1   | CYP17A1 | FANCG  | GATA4  | IRS2   | MAPK1   | MYD88  | PDCD1    | QKI     | SF3B1   | TNFAIP3  |
| ALOX12B    | BRCA1    | CDK12  | DAXX    | FANCL  | GATA6  | JAK1   | MCL1    | NBN    | PDCD1LG2 | RAC1    | SGK1    | TNFRSF14 |
| AMER1      | BRCA2    | CDK4   | DDR1    | FAS    | GID4   | JAK2   | MDM2    | NF1    | PDGFRA   | RAD21   | SMAD2   | TP53     |
| APC        | BRD4     | CDK6   | DDR2    | FBXW7  | GNA11  | JAK3   | MDM4    | NF2    | PDGFRB   | RAD51   | SMAD4   | TSC1     |
| AR         | BRIP1    | CDK8   | DIS3    | FGF10  | GNA13  | JUN    | MED12   | NFE2L2 | PDK1     | RAD51B  | SMARCA4 | TSC2     |
| ARAF       | BTG1     | CDKN1A | DNMT3A  | FGF12  | GNAQ   | KDM5A  | MEF2B   | NFKBIA | PIK3C2B  | RAD51C  | SMARCB1 | TYRO3    |
| ARFRP1     | BTG2     | CDKN1B | DOT1L   | FGF14  | GNAS   | KDM5C  | MEN1    | NKX2-1 | PIK3C2G  | RAD51D  | SMO     | U2AF1    |
| ARID1A     | BTK      | CDKN2A | EED     | FGF19  | GRM3   | KDM6A  | MERTK   | NOTCH1 | PIK3CA   | RAD52   | SNCAIP  | VEGFA    |
| ASXL1      | C11orf30 | CDKN2B | EGFR    | FGF23  | GSK3B  | KDR    | MET     | NOTCH2 | PIK3CB   | RAD54L  | SOCS1   | VHL      |
| ATM        | CALR     | CDKN2C | EP300   | FGF3   | H3F3A  | KEAP1  | MITF    | NOTCH3 | PIK3R1   | RAF1    | SOX2    | WHSC1    |
| ATR        | CARD11   | CEBPA  | EPHA3   | FGF4   | HDAC1  | KEL    | MKNK1   | NPM1   | PIM1     | RARA    | SOX9    | WHSC1L1  |
| ATRX       | CASP8    | CHEK1  | EPHB1   | FGF6   | HGF    | KIT    | MLH1    | NRAS   | PMS2     | RB1     | SPEN    | WT1      |
| AURKA      | CBFB     | CHEK2  | EPHB4   | FGFR1  | HNF1A  | KLHL6  | MPL     | NT5C2  | POLD1    | RBM10   | SPOP    | XPO1     |
| AURKB      | CBL      | CIC    | ERBB2   | FGFR2  | HRAS   | KMT2A  | MRE11A  | NTRK1  | POLE     | REL     | SRC     | XRCC2    |

|       |       |        |       |       |        |       |      |       |         |        |       |        |
|-------|-------|--------|-------|-------|--------|-------|------|-------|---------|--------|-------|--------|
| AXIN1 | CCND1 | CREBBP | ERBB3 | FGFR3 | HSD3B1 | KMT2D | MSH2 | NTRK2 | PPARG   | RET    | STAG2 | ZNF217 |
| AXL   | CCND2 | CRKL   | ERBB4 | FGFR4 | ID3    | KRAS  | MSH3 | NTRK3 | PPP2R1A | RICTOR | STAT3 | ZNF703 |

**Table S2.** Genes with select intronic regions for the detection of gene rearrangements.

|                             |                                          |                              |                       |                    |                          |                     |                       |                       |                        |                       |                      |                          |
|-----------------------------|------------------------------------------|------------------------------|-----------------------|--------------------|--------------------------|---------------------|-----------------------|-----------------------|------------------------|-----------------------|----------------------|--------------------------|
| ALK<br>introns 18, 19       | BRCA1<br>introns 2, 7, 8, 12, 16, 19, 20 | ETV4<br>intron 8             | EZR<br>introns 9- 11  | KIT<br>intron 16   | MYC<br>intron 1          | NUTM1<br>intron 1   | RET<br>introns 7-11   | SLC34A2<br>intron 4   | BCL2<br>3'UTR          | BRCA2<br>intron 2     | ETV5<br>introns 6, 7 | FGFR1<br>intron 1, 5, 17 |
| KMT2A (MLL)<br>introns 6-11 | NOTCH2<br>intron 26                      | PDGFRA<br>introns 7, 9, 11   | ROS1<br>introns 31-35 | TERC<br>ncRNA      | BCR<br>introns 8, 13, 14 | CD74<br>introns 6-8 | ETV6<br>introns 5, 6* | FGFR2<br>intron 1, 17 | MSH2<br>intron 5       | NTRK1<br>introns 8-11 | RAF1<br>introns 4-8  | RSPO2<br>intron 1        |
| TERT<br>Promoter            | BRAF<br>introns 7- 10                    | EGFR<br>introns 7, 15, 24-27 | EWSR1<br>introns 7-13 | FGFR3<br>intron 17 | MYB<br>intron 14         | NTRK2<br>intron 12  | RARA<br>intron 2      | SDC4<br>intron 2      | TMPRSS2<br>introns 1-3 |                       |                      |                          |

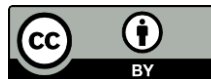

© 2020 by the authors. Licensee MDPI, Basel, Switzerland. This article is an open access article distributed under the terms and conditions of the Creative Commons Attribution (CC BY) license (<http://creativecommons.org/licenses/by/4.0/>).
